# Supplementary material for: Long-living optical gain induced by solvent viscosity in a push–pull molecule
Source: Royal Society of Chemistry journal article supplement (doi:10.1039/c6cp02988d), 2016-01-01
Supplement: c6cp02988d1.pdf [file c6cp02988d1.pdf]

## Supporting Information

# Long-Living Optical Gain Induced by Solvent Viscosity in a Push-Pull Molecule

*Marta M. Mróz<sup>†</sup>, Sara Benedini<sup>§</sup>, Alessandra Forni<sup>#,\*</sup>, Chiara Botta<sup>‡</sup>, Dario Pasini<sup>§</sup>, Elena Cariati<sup>Δ</sup>,  
Tersilla Virgili<sup>†,\*</sup>*

<sup>†</sup>IFN-CNR, Dipartimento di Fisica, Politecnico di Milano, Piazza Leonardo Da Vinci, 32, 20132 Milano, Italy

<sup>‡</sup>ISMAL –CNR and UdR INSTM di Milano, Via Corti 12, 20133 Milano, Italy

<sup>#</sup>ISTM - CNR, c/o Dipartimento di Chimica, Università degli Studi di Milano and UdR INSTM di Milano, Via Golgi 19, 20133 Milano, Italy

<sup>§</sup>Department of Chemistry and INSTM Research Unit, University of Pavia, Viale Taramelli, 10, 27100 Pavia, Italy.

<sup>Δ</sup>Università degli Studi di Milano, Dipartimento di Chimica and UdR INSTM di Milano, via Golgi 19, 20133 Milano, Italy

E.mail: \* [tersilla.virgili@polimi.it](mailto:tersilla.virgili@polimi.it) , [aforni@istm.cnr.it](mailto:aforni@istm.cnr.it)

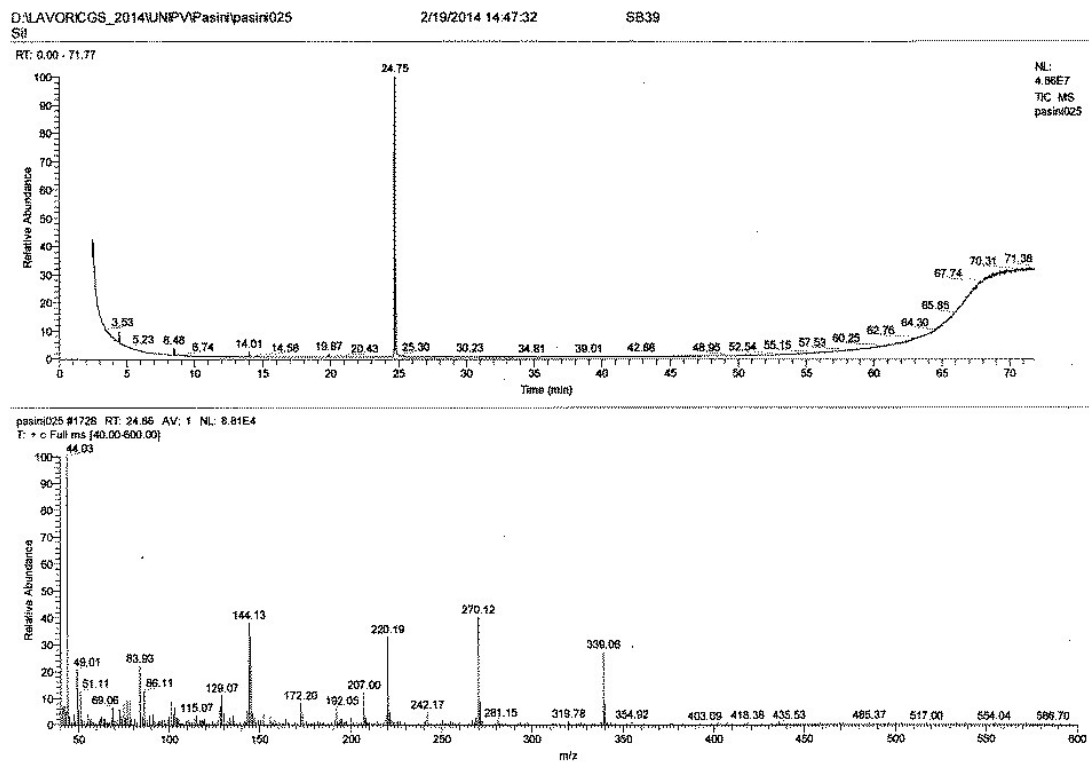

Fig S1: GC/MS compound 1.

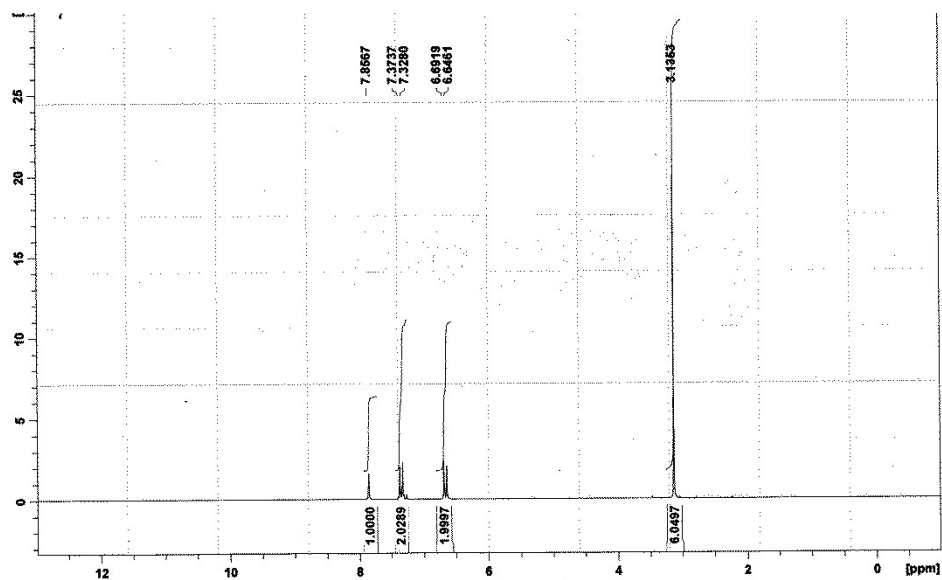

Fig S2:  $^1\text{H}$  NMR of compound 1 (200 MHz,  $\text{CDCl}_3$ )

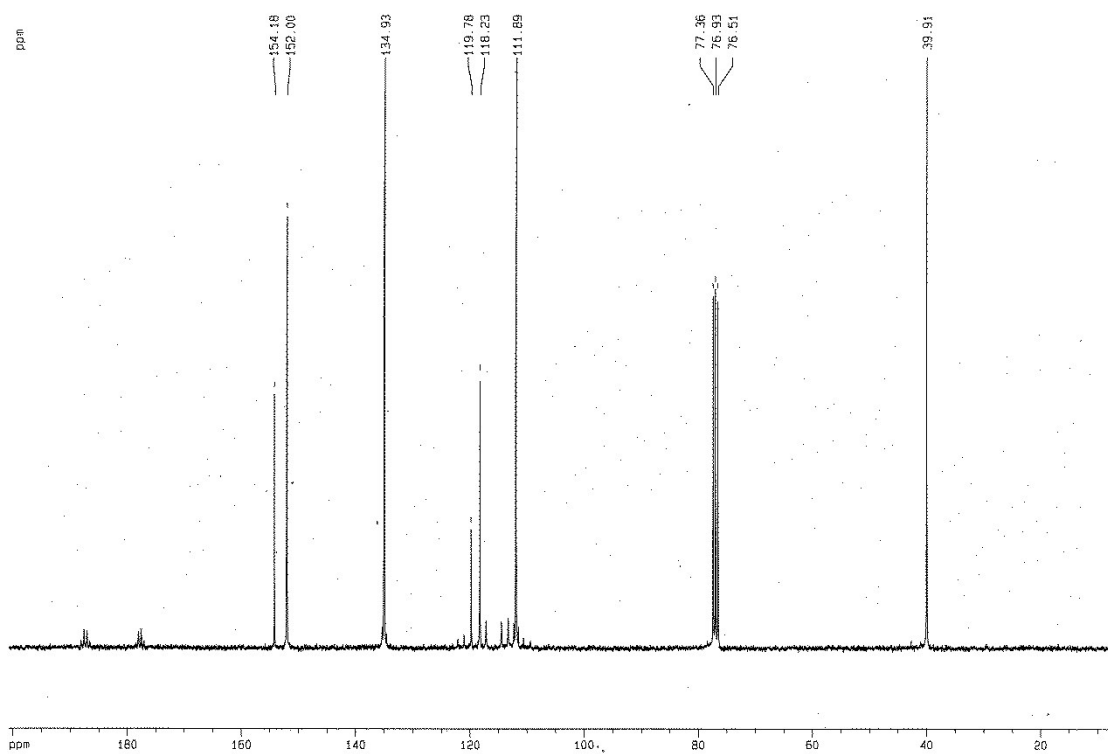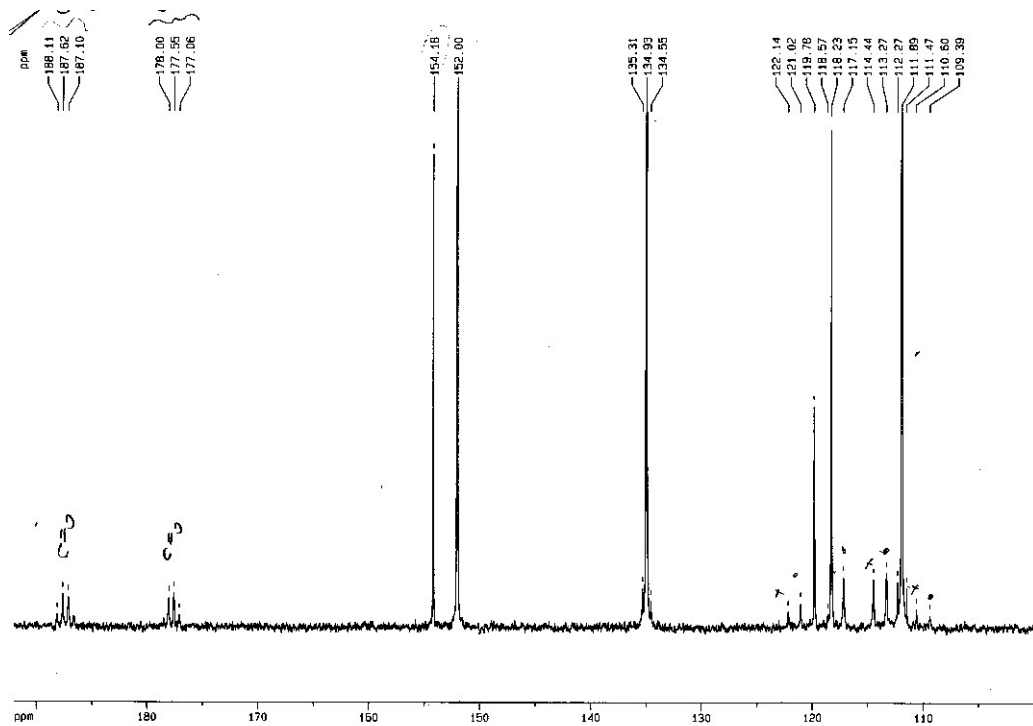

Fig S3: <sup>13</sup>C NMR of compound 1 (300 MHz, CDCl<sub>3</sub>)

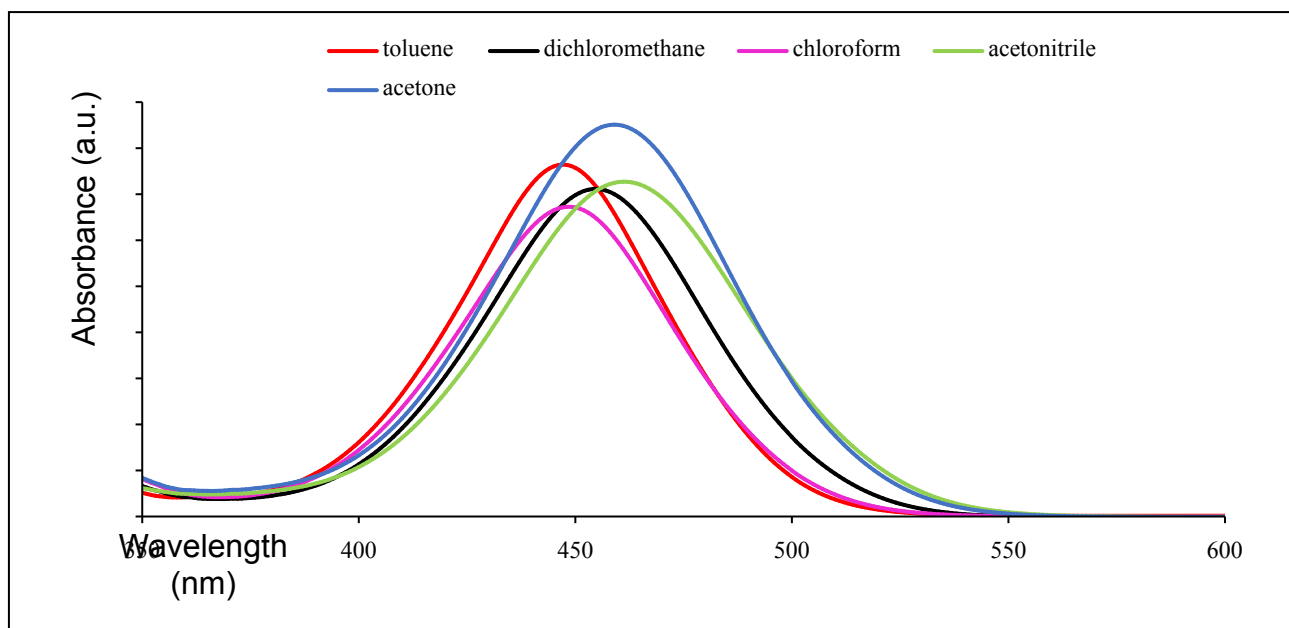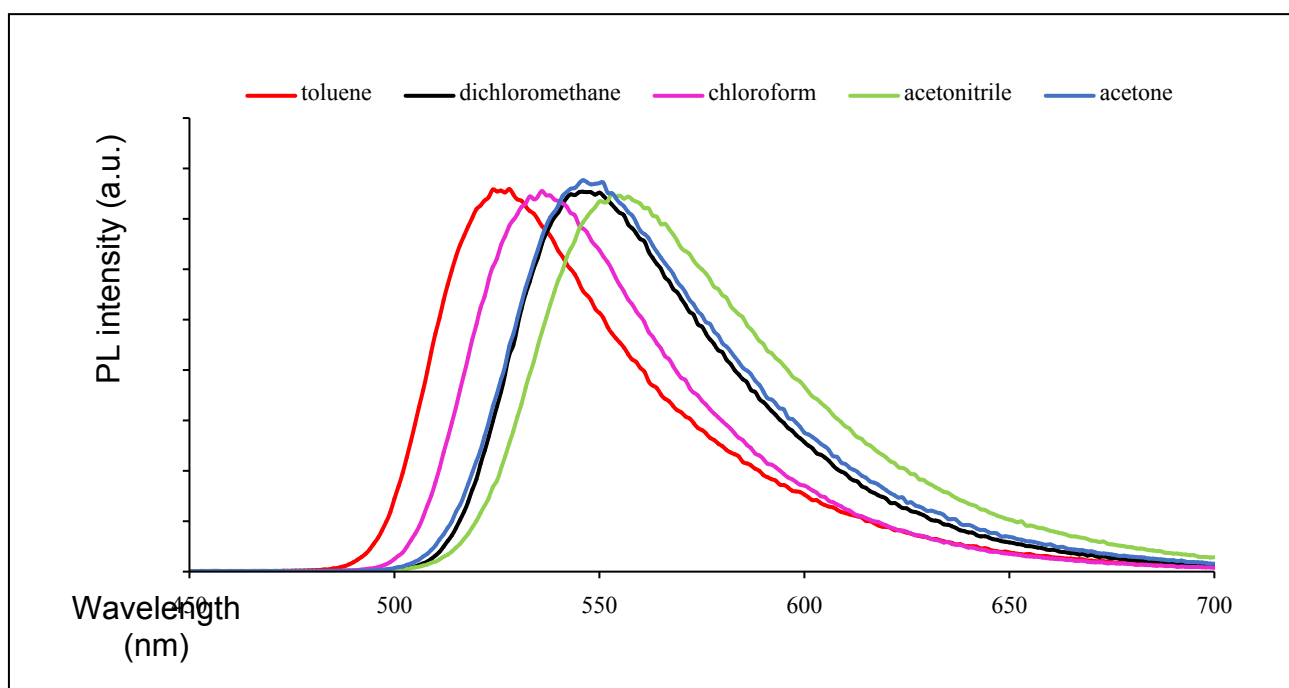

Fig.S4 Absorption (top figure) and emission ( bottom figure) spectra in non-viscous solvents.

Table S1. Optical properties of the solutions with solvent parameters (where n is the refractive index,  $\epsilon$  the solvent polarizability, and  $\Delta f$  the solvent orientation polarizability)

|                  | Abs<br>(nm) | Em<br>(nm) | Stokes<br>shift (eV) | n     | $\epsilon$ | $\Delta f$ |
|------------------|-------------|------------|----------------------|-------|------------|------------|
| n-hexane         | 420         | 484        | 0,390                | 1,375 | 1,900      | 0,001      |
| toluene          | 447         | 522        | 0,399                | 1,497 | 2,400      | 0,015      |
| chloroform       | 449         | 536        | 0,448                | 1,448 | 4,800      | 0,147      |
| dichloromethane  | 455         | 543        | 0,442                | 1,420 | 9,100      | 0,220      |
| PEG <sup>a</sup> | 455         | 527        | 0,372                | 1,466 | 12,400     | 0,225      |
| acetone          | 459         | 546        | 0,430                | 1,359 | 21,000     | 0,285      |
| DEG <sup>b</sup> | 464         | 543        | 0,389                | 1,447 | 31,690     | 0,266      |
| acetonitrile     | 461         | 553        | 0,447                | 1,342 | 36,200     | 0,306      |

<sup>a</sup>polyethylene glycol with molecular weight of 400; <sup>b</sup>diethylene glycol.

$$\Delta f = \frac{\epsilon - 1}{2\epsilon + 1} - \frac{n^2 - 1}{2n^2 + 1}$$

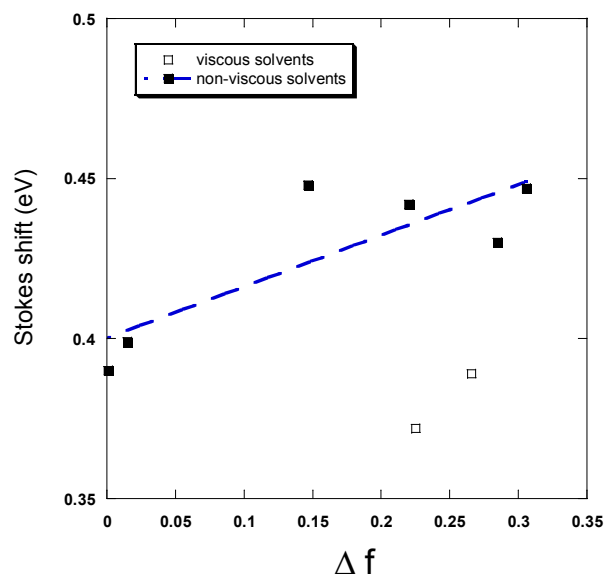

Fig.S5 Plot of the Stokes shifts as a function of the orientation polarizability  $\Delta f$  with the linear fit for non-viscous solvents.

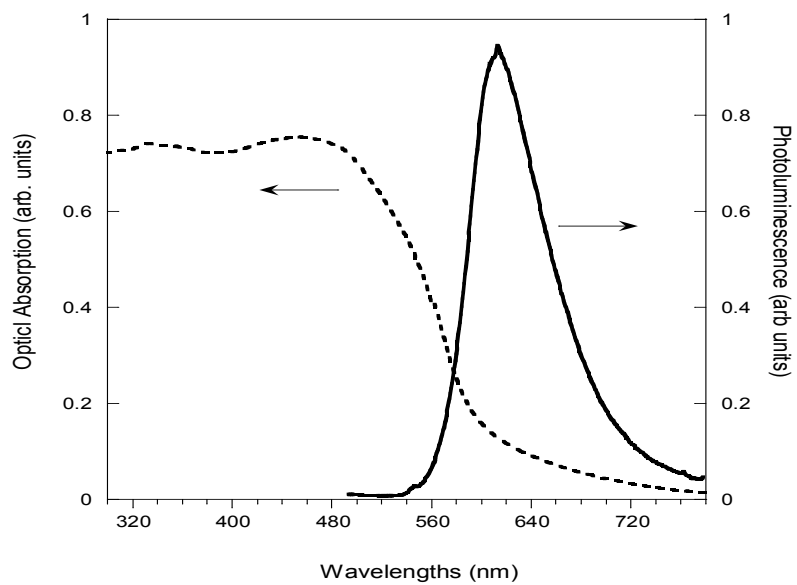

Fig.S6 Absorption (dotted line) and emission (solid line) of solid state **1** .

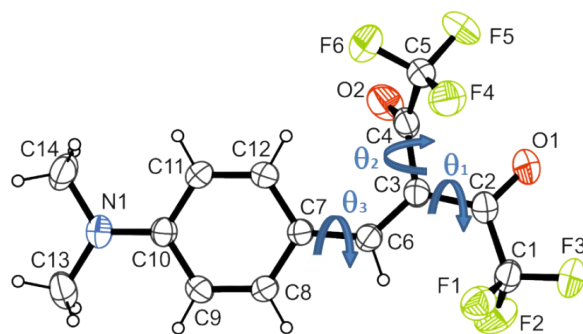

Fig.S7. Ortep drawing of **1** with thermal ellipsoids at the 30% probability level.

Table S2. Selected geometrical parameters (distances in Å, angles in degrees) for **1** as obtained by X-ray analysis and CAM-B3LYP/6-311++G(d,p) geometry optimization in different solvents.

|                    | O1–C2    | O2–C4    | C2–C3    | C3–C4    | C3–C6    | C6–C7    | C10–N1   | $\theta_1$ | $\theta_2$ | $\theta_3$ |
|--------------------|----------|----------|----------|----------|----------|----------|----------|------------|------------|------------|
| X-ray              | 1.218(3) | 1.200(3) | 1.442(3) | 1.490(3) | 1.367(3) | 1.425(3) | 1.347(2) | 170(1)     | -60(1)     | -6(1)      |
| n-hexane           | 1.209    | 1.199    | 1.457    | 1.489    | 1.365    | 1.434    | 1.356    | 172.4      | -54.3      | 5.6        |
| toluene            | 1.210    | 1.199    | 1.455    | 1.489    | 1.366    | 1.432    | 1.355    | 172.6      | -54.4      | 0.6        |
| chloroform         | 1.212    | 1.201    | 1.452    | 1.485    | 1.371    | 1.427    | 1.351    | 170.9      | -50.0      | -1.0       |
| dichloromethane    | 1.213    | 1.202    | 1.450    | 1.483    | 1.374    | 1.424    | 1.349    | 170.3      | -48.4      | -2.1       |
| acetone            | 1.214    | 1.202    | 1.449    | 1.482    | 1.376    | 1.422    | 1.348    | 170.0      | -47.6      | -2.6       |
| acetonitrile (ACN) | 1.214    | 1.202    | 1.448    | 1.482    | 1.376    | 1.422    | 1.347    | 169.9      | -47.4      | -2.9       |

Table S3. Thermal analysis on GS, LE and TICT states from PCM-(TD)-CAM-B3LYP/6-311++G(d,p) calculations in ACN.

**GS:**

|     |                                              |                             |
|-----|----------------------------------------------|-----------------------------|
| E = | SCF Done: E(RCAM-B3LYP) = -1344.24702684     |                             |
|     | Zero-point correction=                       | 0.237289 (Hartree/Particle) |
|     | Thermal correction to Energy=                | 0.258889                    |
|     | Thermal correction to Enthalpy=              | 0.259833                    |
|     | Thermal correction to Gibbs Free Energy=     | 0.183441                    |
|     | Sum of electronic and zero-point Energies=   | -1344.009738                |
|     | Sum of electronic and thermal Energies=      | -1343.988138                |
|     | Sum of electronic and thermal Enthalpies=    | -1343.987194                |
| G = | Sum of electronic and thermal Free Energies= | -1344.063586                |

**LE:**

|     |                                               |                             |
|-----|-----------------------------------------------|-----------------------------|
| E = | Total Energy, E(TD-HF/TD-KS) = -1344.15147533 |                             |
|     | Zero-point correction=                        | 0.234531 (Hartree/Particle) |
|     | Thermal correction to Energy=                 | 0.256522                    |
|     | Thermal correction to Enthalpy=               | 0.257466                    |
|     | Thermal correction to Gibbs Free Energy=      | 0.180513                    |
|     | Sum of electronic and zero-point Energies=    | -1343.916945                |
|     | Sum of electronic and thermal Energies=       | -1343.894954                |
|     | Sum of electronic and thermal Enthalpies=     | -1343.894009                |
| G = | Sum of electronic and thermal Free Energies=  | -1343.970963                |

**TICT:**

|     |                                               |                             |
|-----|-----------------------------------------------|-----------------------------|
| E = | Total Energy, E(TD-HF/TD-KS) = -1344.15370939 |                             |
|     | Zero-point correction=                        | 0.235276 (Hartree/Particle) |
|     | Thermal correction to Energy=                 | 0.256208                    |
|     | Thermal correction to Enthalpy=               | 0.257153                    |
|     | Thermal correction to Gibbs Free Energy=      | 0.183331                    |
|     | Sum of electronic and zero-point Energies=    | -1343.918433                |
|     | Sum of electronic and thermal Energies=       | -1343.897501                |
|     | Sum of electronic and thermal Enthalpies=     | -1343.896557                |
| G = | Sum of electronic and thermal Free Energies=  | -1343.970379                |

$$\Delta(E_{LE}-E_{GS}) = 0.09555151 \text{ a.u.} = 2.600 \text{ eV}$$

$$\Delta(E_{TICT}-E_{GS}) = 0.09331745 \text{ a.u.} = 2.539 \text{ eV}$$

$$\Delta(E_{LE}-E_{TICT}) = 0.00223406 \text{ a.u.} = 0.0608 \text{ eV}$$

$$\Delta(G_{LE}-G_{GS}) = 0.092623 \text{ a.u.} = 2.520 \text{ eV}$$

$$\Delta(G_{TICT}-G_{GS}) = 0.093207 \text{ a.u.} = 2.536 \text{ eV}$$

$$\Delta(G_{LE}-G_{TICT}) = -0.000584 \text{ a.u.} = -0.0159 \text{ eV}$$

where  $G = E + E_t + E_r + E_v + E_e + E_{\text{zero-point}} + k_bT - TS_{\text{tot}}$   
and  $S_{\text{tot}} = S_t + S_r + S_v + S_{el}$



Table S4. PCM-(TD)-CAM-B3LYP/6-311++G(d,p) optimized coordinates of 1 in ACN.

**GS :**

|   |             |             |             |
|---|-------------|-------------|-------------|
| F | 2.30737700  | -2.47290800 | 1.26396600  |
| F | 2.30909100  | -2.97740400 | -0.84516800 |
| F | 4.15893800  | -2.49988600 | 0.15794000  |
| F | 2.80980900  | 1.69931300  | 1.38709500  |
| F | 3.31224800  | 2.84724600  | -0.38352300 |
| F | 1.53914300  | 3.32072700  | 0.75136600  |
| O | 3.71661600  | -0.07467600 | -0.57428900 |
| O | 0.78998000  | 1.94093300  | -1.43658300 |
| N | -5.31499000 | -0.00593800 | 0.09010400  |
| C | 2.87193000  | -2.17974400 | 0.08115500  |
| C | 2.70270800  | -0.67950900 | -0.28992000 |
| C | 1.38810900  | -0.07260500 | -0.30320300 |
| C | 1.42599200  | 1.38208000  | -0.58281100 |
| C | 2.30572200  | 2.30956500  | 0.31129900  |
| C | 0.23659700  | -0.81576600 | -0.17827500 |
| H | 0.40689100  | -1.87931800 | -0.06015400 |
| C | -1.15103300 | -0.50930300 | -0.13599000 |
| C | -2.03378900 | -1.60916800 | -0.01741800 |
| H | -1.61748500 | -2.60959200 | 0.02027500  |
| C | -3.39243600 | -1.46395500 | 0.05350700  |
| H | -4.01044700 | -2.34466500 | 0.14117900  |
| C | -3.98010400 | -0.17314400 | 0.02098500  |
| C | -3.10063200 | 0.94071400  | -0.08516100 |
| H | -3.50058300 | 1.94328200  | -0.10803000 |
| C | -1.74621900 | 0.77397800  | -0.16527500 |
| H | -1.13895700 | 1.66076000  | -0.25303400 |
| C | -6.19742400 | -1.15998100 | 0.19833700  |
| H | -6.08438700 | -1.82706500 | -0.65966800 |
| H | -7.22676600 | -0.81550100 | 0.22761200  |
| H | -5.99987600 | -1.72735900 | 1.11137900  |
| C | -5.89909100 | 1.32897000  | 0.06916900  |
| H | -5.55324700 | 1.92807600  | 0.91510300  |
| H | -6.97945300 | 1.24104200  | 0.13483800  |
| H | -5.65495700 | 1.85524800  | -0.85674200 |

**LE :**

|   |             |             |             |
|---|-------------|-------------|-------------|
| F | 2.19889000  | -2.27771400 | 1.44817300  |
| F | 2.61549000  | -2.99679300 | -0.55499400 |
| F | 4.21778500  | -2.25957200 | 0.68884500  |
| F | 2.79310900  | 1.94044500  | 1.10118800  |
| F | 3.05924200  | 2.78597100  | -0.88030400 |
| F | 1.42695800  | 3.43267700  | 0.36718500  |
| O | 3.75488900  | -0.02198400 | -0.52212000 |
| O | 0.23595400  | 1.74800100  | -1.22492300 |
| N | -5.19609000 | -0.00111000 | 0.20696100  |
| C | 2.94487700  | -2.05878000 | 0.35541200  |
| C | 2.74826700  | -0.62768300 | -0.21595500 |
| C | 1.38984300  | -0.12523200 | -0.37132100 |
| C | 1.19864100  | 1.29809500  | -0.61295900 |
| C | 2.14335800  | 2.35594100  | 0.00433500  |
| C | 0.29510700  | -1.00323100 | -0.47118400 |
| H | 0.50073100  | -2.03903400 | -0.71425900 |
| C | -1.08438900 | -0.69355600 | -0.28911600 |
| C | -2.06394100 | -1.58166800 | -0.82002500 |
| H | -1.73041100 | -2.44850100 | -1.37794200 |

|   |             |             |             |
|---|-------------|-------------|-------------|
| C | -3.39908300 | -1.36624200 | -0.66033200 |
| H | -4.09949700 | -2.06542600 | -1.09223900 |
| C | -3.87772400 | -0.23049600 | 0.07033600  |
| C | -2.90620500 | 0.63868800  | 0.64275100  |
| H | -3.22136200 | 1.49070300  | 1.22639000  |
| C | -1.57034400 | 0.41761400  | 0.46997200  |
| H | -0.86961700 | 1.08053900  | 0.95518100  |
| C | -6.17969500 | -0.90147500 | -0.38314200 |
| H | -6.04618500 | -0.97181200 | -1.46482500 |
| H | -7.17385200 | -0.51425600 | -0.18448800 |
| H | -6.10527200 | -1.90287900 | 0.04844600  |
| C | -5.67259000 | 1.14704500  | 0.96680400  |
| H | -5.35051900 | 1.08783900  | 2.00968000  |
| H | -6.75730200 | 1.16270800  | 0.94023400  |
| H | -5.30082300 | 2.08051100  | 0.53715100  |

**TICT:**

|   |             |             |             |
|---|-------------|-------------|-------------|
| F | 2.63267000  | -2.36303700 | 1.26256600  |
| F | 2.75833100  | -2.80707000 | -0.85742400 |
| F | 4.48687600  | -2.07573500 | 0.20370800  |
| F | 2.87259600  | 2.19840800  | 1.04560200  |
| F | 2.61591100  | 2.76772300  | -1.03798100 |
| F | 1.28698100  | 3.52739600  | 0.47057300  |
| O | 3.70471400  | 0.23788500  | -0.56480900 |
| O | -0.22564800 | 1.60175700  | -0.18714800 |
| N | -5.16692600 | -0.13580500 | 0.06034400  |
| C | 3.16397900  | -1.94886300 | 0.10052800  |
| C | 2.77854400  | -0.47821600 | -0.24522600 |
| C | 1.37868200  | -0.10451100 | -0.17071500 |
| C | 0.97105500  | 1.26253700  | -0.12615600 |
| C | 1.95702600  | 2.42796000  | 0.08707600  |
| C | 0.36719500  | -1.08581600 | -0.18434100 |
| H | 0.62307100  | -2.13317300 | -0.26622500 |
| C | -1.05374200 | -0.78054800 | -0.12290700 |
| C | -1.73775100 | -0.70235600 | 1.12456000  |
| H | -1.16169400 | -0.80276700 | 2.03536500  |
| C | -3.07638900 | -0.49010300 | 1.19620700  |
| H | -3.55232200 | -0.42203400 | 2.16219000  |
| C | -3.85675900 | -0.35746500 | 0.00103100  |
| C | -3.18341900 | -0.47583000 | -1.25880300 |
| H | -3.74224900 | -0.40174600 | -2.17883900 |
| C | -1.84279100 | -0.67896300 | -1.30583300 |
| H | -1.34647800 | -0.76115000 | -2.26411000 |
| C | -5.85418300 | -0.02073200 | 1.34822700  |
| H | -5.75219200 | -0.94163000 | 1.92258500  |
| H | -6.90796700 | 0.15928000  | 1.16720000  |
| H | -5.45239300 | 0.81266400  | 1.92469300  |
| C | -5.96526700 | -0.00163700 | -1.15983800 |
| H | -5.60621500 | 0.83141400  | -1.76431300 |
| H | -6.99646800 | 0.18986700  | -0.88399300 |
| H | -5.92650200 | -0.91913500 | -1.74756100 |
